# Supplementary material for: The Effects of Using Socio-Scientific Issues and Technology in Problem-Based Learning: A Systematic Review
Source: MDPI journal article supplement (doi:10.3390/educsci11100640), 2021-10-14
Supplement: s1 [file s1]

Archive with 1 entries (1 files):
- education-1383314-supplementary.pdf
